# Supplementary material for: Modulation of serotonin transporter expression by escitalopram under inflammation
Source: PubMed Central journal article supplement (PMC11162477; doi:10.1038/s42003-024-06240-3), 2024-06-08
Supplement: 42003_2024_6240_MOESM2_ESM.pdf [file 42003_2024_6240_MOESM2_ESM.pdf]

## Supporting Information for

---

# Modulation of Serotonin Transporter Expression by Escitalopram under Inflammation

---

Sergio Mena<sup>1</sup>, Allison Cruikshank<sup>2</sup>, Janet Best<sup>3</sup>, Nijhout, HF<sup>4</sup>, Michael C. Reed<sup>2</sup>, Parastoo Hashemi<sup>1\*</sup>

<sup>1</sup> Department of Bioengineering, Imperial College London, SW7 2AZ UK

<sup>2</sup> Department of Mathematics, Duke University, Durham, NC, USA

<sup>3</sup> Department of Mathematics, The Ohio State University, Columbus, OH, USA

<sup>4</sup> Department of Biology, Duke University, Durham, NC, USA

Email: [phashemi@imperial.ac.uk](mailto:phashemi@imperial.ac.uk)

This file includes:

- Supplementary Notes 1-5
- Supplementary Figures S1-S5

## Full definition of the model

### Pharmacokinetics of escitalopram (Supplementary Note 1)

*ODE system*

$$\frac{dQ_0}{dt} = inj - k_{01}C_0 \quad (1)$$

$$\frac{dQ_1}{dt} = k_{01}Q_0 - (k_{10} + k_{12} + k_{13})Q_1(1 - P_B) + k_{21}Q_2(1 - P_B^{brain}) + k_{31}Q_3 \quad (2)$$

$$\frac{dQ_2}{dt} = k_{12}Q_1(1 - P_B) - k_{21}Q_2(1 - P_B^{brain}) \quad (3)$$

$$\frac{dQ_3}{dt} = k_{13}Q_1(1 - P_B) - k_{31}Q_3 \quad (4)$$

*Constant parameters*

| Parameter | Value | Description                                                    |
|-----------|-------|----------------------------------------------------------------|
| $k_{01}$  | 0.60* | Rate of transport from peritoneum to plasma (h <sup>-1</sup> ) |
| $k_{10}$  | 3     | Rate of removal from plasma (h <sup>-1</sup> )                 |
| $k_{12}$  | 9.90  | Rate of transport blood to brain (h <sup>-1</sup> )            |

|                      |      |                                                          |
|----------------------|------|----------------------------------------------------------|
| $k_{21}$             | 2910 | Rate of transport brain to blood ( $\text{h}^{-1}$ )     |
| $k_{13}$             | 6    | Rate of transport blood to periphery ( $\text{h}^{-1}$ ) |
| $k_{31}$             | 0.60 | Rate of transport periphery to blood ( $\text{h}^{-1}$ ) |
| $P_B$                | 0.56 | Ratio of escitalopram bound to proteins in plasma        |
| $p_B^{\text{brain}}$ | 0.15 | Ratio of escitalopram bound to proteins in brain         |

\*Set to 40% when modelling oral administration of escitalopram.

### System variables and initial conditions

| Variable | Initial condition | Description                                  |
|----------|-------------------|----------------------------------------------|
| $Q_0$    | 0                 | Escitalopram in peritoneum ( $\mu\text{g}$ ) |
| $Q_1$    | 0                 | Escitalopram in plasma ( $\mu\text{g}$ )     |
| $Q_2$    | 0                 | Escitalopram in brain ( $\mu\text{g}$ )      |
| $Q_3$    | 0                 | Escitalopram in periphery ( $\mu\text{g}$ )  |

### Function-defined variables

#### Escitalopram intraperitoneal injection rate ( $\mu\text{g h}^{-1}$ )

##### Function

$$inj(t) = \begin{cases} 0, & t < t_{start} \\ q/t_{inj}, & t_{start} < t < t_{start} + t_{inj} \\ 0, & t > t_{start} + t_{inj} \end{cases}$$

$$q = dose \cdot weight \cdot bioavailability$$

##### Parameters

$q$ : effective quantity of injected escitalopram into the peritoneum ( $\mu\text{g}$ ). Dependent on dose given ( $\text{mg kg}^{-1}$ ), weight (mg) and bioavailability.

$t_{start}$ : time at start of injection (h).

$t_{inj}$ : duration of injection (h).

When a train of injections is applied,  $t_{start} = t_{start}^0 + n_{inj} \cdot t_{interval}$ , where  $t_{start}^0$  is the start time of the first injection (h),  $n_{inj}$  is the injection number starting from 0 and  $t_{interval}$  is the time between injections (h)

## Pharmacokinetics of $\alpha$ -fluoromethylhistidine (Supplementary Note 2)

Pharmacokinetics of  $\alpha$ -fluoromethylhistidine were modelled as the four-compartment model modelled in Equations 1-4, and analogous system variables given above, and the following constants:

*Constant parameters*

| Parameter            | Value  | Description                                                       |
|----------------------|--------|-------------------------------------------------------------------|
| $k_{01}$             | 3.75   | FMH rate of transport of peritoneum to plasma ( $\text{h}^{-1}$ ) |
| $k_{10}$             | 1.75   | FMH rate of removal from plasma ( $\text{h}^{-1}$ )               |
| $k_{12}$             | 0.1875 | FMH rate of transport blood to brain ( $\text{h}^{-1}$ )          |
| $k_{21}$             | 3.5    | FMH rate of transport brain to blood ( $\text{h}^{-1}$ )          |
| $k_{13}$             | 5      | FMH rate of transport blood to periphery ( $\text{h}^{-1}$ )      |
| $k_{31}$             | 1.5    | FMH rate of transport periphery to blood ( $\text{h}^{-1}$ )      |
| $P_B$                | 0.6    | Ratio of FMH bound to proteins in plasma                          |
| $p_B^{\text{brain}}$ | 0.15   | Ratio of FMH bound to proteins in brain                           |

## Serotonin terminal model (Supplementary Note 3)

*ODE system*

$$\frac{dbtrp}{dt} = TRP_{in} - VTRP_{in}(btrp) - a_1 \cdot (btrp - btrp_0) \quad (5)$$

$$\frac{dbh2}{dt} = inhib_{5HTto5HT}^{syn}(G_{5HT}^*, G_{5HT,0}^*) \cdot V_{TPH}(trp, bh4) - V_{DRR}(bh2, NADPH, bh4, NADP) \quad (6)$$

$$\frac{dbh4}{dt} = V_{DRR}(bh2, NADPH, bh4, NADP) - inhib_{5HTto5HT}^{syn}(G_{5HT}^*, G_{5HT,0}^*) \cdot V_{TPH}(trp, bh4) \quad (7)$$

$$\frac{dtrp}{dt} = VTRP_{in}(btrp) - inhib_{5HTto5HT}^{syn}(G_{5HT}^*, G_{5HT,0}^*) \cdot V_{TPH}(trp, bh4) - V_{pool}(trp, trp_{pool}) - a_{12} \cdot trp \quad (8)$$

$$\frac{d5HTP}{dt} = inhib_{5HTto5HT}^{syn}(G_{5HT}^*, G_{5HT,0}^*) \cdot V_{TPH}(trp, bh4) - V_{AADC}(5HTP) \quad (9)$$

$$\begin{aligned} \frac{dc5HT}{dt} = & V_{AADC}(5HTP) - V_{MAT}(c5HT, v5HT) - V_{MAT}(c5HT, v5HT_r) + V_{SERT}(e5HT, SERT_s, K_m^{app}) - TC_{catab}(c5HT) \\ & - a_{15} \cdot (c5HT - e5HT) \end{aligned} \quad (10)$$

$$\begin{aligned} \frac{dv5HT}{dt} = & V_{MAT}(c5HT, v5HT) - a_{16} \cdot inhib_{5HTto5HT}^R(G_{5HT}^*, G_{5HT,0}^*) \cdot inhib_{HAto5HT}^R(G_{HA}^*, G_{HA,0}^*) \cdot fire5HT(t) \cdot v5HT \\ & + V_{traff}^{5HT}(v5HT, v5HT_0) \end{aligned} \quad (11)$$

$$\frac{dv5HT_r}{dt} = V_{MAT}(c5HT, v5HT_r) - V_{traff}^{5HT}(v5HT, v5HT_0) \quad (12)$$

$$\begin{aligned} \frac{de5HT}{dt} = & a_{16} \cdot inhib_{5HTto5HT}^R(G_{5HT}^*, G_{5HT,0}^*) \cdot inhib_{HAto5HT}^R(G_{HA}^*, G_{HA,0}^*) \cdot fire5HT(t) \cdot v5HT - V_{SERT}(e5HT, SERT_s, K_m^{app}) \\ & - a_{11} \cdot H1_{5HT}(e5HT, e5HT_0) \cdot V_{UP2}(e5HT) - a_{14} \cdot e5HT + a_8 \cdot (c5HT - e5HT) + a_9 \cdot (g5HT - e5HT) \end{aligned} \quad (13)$$

$$\frac{d5HIAA}{dt} = TC_{catab}(c5HT) + TC_{catab}(g5HT) - a_{10} \cdot 5HIAA \quad (14)$$

$$\frac{dtrp_{pool}}{dt} = V_{pool}(trp, trp_{pool}) - a_{13} \cdot trp_{pool} \quad (15)$$

$$\frac{dG_{5HT}^*}{dt} = a_2 \cdot (B_{5HT})^2 \cdot (G_{5HT}^{total} - G_{5HT}^*) - a_3 \cdot T_{5HT}^* \cdot G_{5HT}^* \quad (16)$$

$$\frac{dT_{5HT}^*}{dt} = a_4 \cdot (G_{5HT}^*)^2 \cdot (T_{5HT}^{total} - T_{5HT}^*) - a_5 \cdot T_{5HT}^* \quad (17)$$

$$\frac{dB_{5HT}}{dt} = a_6 \cdot e_{5HT} \cdot (B_{5HT}^{total} - B_{5HT}) - a_7 \cdot B_{5HT} \quad (18)$$

$$\frac{dg_{5HT}}{dt} = a_{11} \cdot H_{1_{5HT}}(e_{5HT}, e_{5HT_0}) \cdot V_{UP2}(e_{5HT}) - TC_{catab}(g_{5HT}) - a_9 \cdot (g_{5HT} - e_{5HT}) \quad (19)$$

$$\frac{dG'_{HA}}{dt} = a_{17} \cdot (B'_{HA})^2 \cdot (G'_{HA}{}^{total} - G'_{HA}{}^*) - a_{18} \cdot T'_{HA}{}^* \cdot G'_{HA}{}^* \quad (20)$$

$$\frac{dT'_{HA}{}^*}{dt} = a_{19} \cdot (G'_{HA}{}^*)^2 \cdot (T'_{HA}{}^{total} - T'_{HA}{}^*) - a_{20} \cdot T'_{HA}{}^* \quad (21)$$

$$\frac{dB'_{HA}}{dt} = a_{21} \cdot e_{HA} \cdot (B'_{HA}{}^{total} - B'_{HA}) - a_{22} \cdot B'_{HA} \quad (22)$$

$$\frac{dSERT_s^{pho}}{dt} = k_{ps}(G_{5HT}^*, G_{5HT,0}^*) \cdot SERT_p - k_{sp}(G_{5HT}^*, G_{5HT,0}^*) \cdot SERT_s^{pho} \quad (23)$$

$$\frac{dSERT_s}{dt} = \frac{dSERT_s^{pho}}{dt} + k_{is} \cdot SERT_i - k_{si}([ESCIT]) \cdot SERT_s \quad (24)$$

$$\frac{dSERT_p}{dt} = k_{sp}(G_{5HT}^*, G_{5HT,0}^*) \cdot SERT_p - k_{ps}(G_{5HT}^*, G_{5HT,0}^*) \cdot SERT_p \quad (25)$$

$$\frac{dSERT_i}{dt} = k_{si}([ESCIT]) \cdot SERT_s - k_{is} \cdot SERT_i \quad (26)$$

Constant parameters

| Parameter               | Value   | Description                                                                              |
|-------------------------|---------|------------------------------------------------------------------------------------------|
| $a_1$                   | 5       | Strength of <i>btrp</i> stabilization ( $h^{-1}$ )                                       |
| $a_2$                   | 20      | Strength of $B_{5HT}$ to produce $G_{5HT}^*$ ( $h^{-1}$ )                                |
| $a_3$                   | 200     | Strength of $T_{5HT}^*$ to deactivate $G_{5HT}^*$ ( $h^{-1}$ )                           |
| $a_4$                   | 30      | Strength of $G_{5HT}^*$ to produce $T_{5HT}^*$ ( $h^{-1}$ )                              |
| $a_5$                   | 200     | Strength of $T_{5HT}^*$ decay ( $h^{-1}$ )                                               |
| $a_6$                   | 36      | Strength of <i>e5HT</i> bounding to autoreceptors ( $h^{-1}$ )                           |
| $a_7$                   | 20      | Strength of <i>e5HT</i> unbounding from autoreceptors ( $h^{-1}$ )                       |
| $a_8$                   | 1       | Strength of bidirectional leakage between <i>c5HT</i> and <i>e5HT</i> ( $h^{-1}$ )       |
| $a_9$                   | 1       | Strength of bidirectional leakage between <i>g5HT</i> and <i>e5HT</i> ( $h^{-1}$ )       |
| $a_{10}$                | 1       | Strength of catabolism of 5HIAA ( $h^{-1}$ )                                             |
| $a_{11}$                | 0.001   | Uptake 2 multiplier ratio                                                                |
| $a_{12}$                | 2       | Strength of <i>trp</i> removal ( $h^{-1}$ )                                              |
| $a_{13}$                | 1       | Strength of <i>trp<sub>pool</sub></i> removal ( $h^{-1}$ )                               |
| $a_{14}$                | 40      | Strength of <i>e5HT</i> removal ( $h^{-1}$ )                                             |
| $a_{15}$                | 1       | Strength of replenishment of <i>v5HT</i> from <i>v5HT<sub>reserve</sub></i> ( $h^{-1}$ ) |
| $a_{16}$                | 1.89    | Factor of release per serotonin firing event                                             |
| $a_{17}$                | 100     | Strength of $B'_{HA}$ to produce $G'_{HA}^*$ ( $h^{-1}$ )                                |
| $a_{18}$                | 961.094 | Strength of $T'_{HA}^*$ to deactivate $G'_{HA}^*$ ( $h^{-1}$ )                           |
| $a_{19}$                | 20      | Strength of $G'_{HA}^*$ to produce $T'_{HA}^*$ ( $h^{-1}$ )                              |
| $a_{20}$                | 66.2992 | Strength of $T'_{HA}^*$ decay ( $h^{-1}$ )                                               |
| $a_{21}$                | 5       | Strength of <i>eHA</i> bounding to heteroreceptors ( $h^{-1}$ )                          |
| $a_{22}$                | 65.5179 | Strength of <i>eHA</i> unbounding from heteroreceptors ( $h^{-1}$ )                      |
| <i>NADPH</i>            | 330     | <i>NADPH</i> concentration ( $\mu M$ )                                                   |
| <i>NADP</i>             | 26      | <i>NADP</i> concentration ( $\mu M$ )                                                    |
| <i>TRP<sub>in</sub></i> | 157.60  | Rate of blood tryptophan replenishment ( $\mu M h^{-1}$ )                                |
| $G_{5HT}^{total}$       | 10      | Total G protein in serotonin autoreceptors ( $\mu M$ )                                   |
| $T_{5HT}^{total}$       | 10      | Total regulator of G protein from serotonin autoreceptors ( $\mu M$ )                    |
| $B_{5HT}^{total}$       | 10      | Total serotonin autoreceptors ( $\mu M$ )                                                |

|                  |        |                                                                             |
|------------------|--------|-----------------------------------------------------------------------------|
| $G_{HA}^{total}$ | 10     | Total G protein in histamine heteroreceptors ( $\mu\text{M}$ )              |
| $T_{HA}^{total}$ | 10     | Total regulator of G protein in histamine heteroreceptors ( $\mu\text{M}$ ) |
| $B_{HA}^{total}$ | 10     | Total histamine heteroreceptors ( $\mu\text{M}$ )                           |
| $btrp_0$         | 96     | $btrp$ in equilibrium ( $\mu\text{M}$ )                                     |
| $v5HT_0$         | 63.05  | $v5HT$ in equilibrium ( $\mu\text{M}$ )                                     |
| $e5HT_0$         | 0.06   | $e5HT$ in equilibrium ( $\mu\text{M}$ )                                     |
| $G_{5HT,0}^*$    | 0.8561 | $G_{5HT}^*$ in equilibrium ( $\mu\text{M}$ )                                |
| $G_{HA,0}^*$     | 0.7484 | $G_{HA}^*$ in equilibrium ( $\mu\text{M}$ )                                 |
| $k_{is}$         | 0.75   | Strength of serotonin transporter reactivation ( $\text{h}^{-1}$ )          |

System variables and initial conditions

| Variable     | Initial condition | Description                                                                      |
|--------------|-------------------|----------------------------------------------------------------------------------|
| $btrp$       | 95.97             | Blood tryptophan ( $\mu\text{M}$ )                                               |
| $bh2$        | 0.0994            | Cytosolic dihydrobiopterin ( $\mu\text{M}$ )                                     |
| $bh4$        | 0.9006            | Cytosolic tetrahydrobiopterin ( $\mu\text{M}$ )                                  |
| $trp$        | 20.1618           | Cytosolic tryptophan ( $\mu\text{M}$ )                                           |
| $5HTP$       | 1.6094            | Cytosolic 5-hydroxy-L-tryptophan ( $\mu\text{M}$ )                               |
| $c5HT$       | 0.0373            | Cytosolic serotonin ( $\mu\text{M}$ )                                            |
| $v5HT$       | 63.0383           | Vesicular serotonin in readily releasable pool (RRP) ( $\mu\text{M}$ )           |
| $c5HT_r$     | 280.0048          | Reserve of vesicular serotonin ( $\mu\text{M}$ )                                 |
| $e5HT$       | 0.0603            | Extracellular serotonin ( $\mu\text{M}$ )                                        |
| $5HIAA$      | 1.6824            | 5-Hydroxyindoleacetic acid ( $\mu\text{M}$ )                                     |
| $trp_{pool}$ | 113.4099          | Pool of tryptophan ( $\mu\text{M}$ )                                             |
| $G_{5HT}^*$  | 0.8660            | Serotonin activated G-protein from autoreceptors ( $\mu\text{M}$ )               |
| $T_{5HT}^*$  | 1.0112            | Regulator of serotonin activated G-protein from autoreceptors ( $\mu\text{M}$ )  |
| $B_{5HT}$    | 0.9791            | Autoreceptor bound serotonin ( $\mu\text{M}$ )                                   |
| $g5HT$       | 0.0027            | Glial cytosolic serotonin ( $\mu\text{M}$ )                                      |
| $G_{HA}^*$   | 0.7114            | Histamine activated G-protein from heteroreceptors( $\mu\text{M}$ )              |
| $T_{HA}^*$   | 1.3245            | Regulator of histamine activated G-protein from heteroreceptors( $\mu\text{M}$ ) |
| $B_{5HT}$    | 1.3245            | Heteroreceptor bound histamine ( $\mu\text{M}$ )                                 |



|                |        |                                                                       |
|----------------|--------|-----------------------------------------------------------------------|
| $SERT_s^{pho}$ | 0.2666 | Ratio of phosphorylated serotonin transporter in the membrane surface |
| $SERT_s$       | 1.0203 | Ratio of total serotonin transporter in the membrane surface          |
| $SERT_p$       | 0.2297 | Ratio of serotonin in vesicular pool                                  |
| $SERT_i$       | 0      | Ratio of escitalopram-induced inactive serotonin transporter          |

Function-defined variables

|                   |                                                                                             |
|-------------------|---------------------------------------------------------------------------------------------|
| <b>Function</b>   | <b>Rate of tryptophan transport from blood to cytosol (<math>\mu\text{M h}^{-1}</math>)</b> |
|                   | $VTRP_{in}(btrp) = \frac{700 \cdot btrp}{btrp + 330}$                                       |
| <b>Parameters</b> | $V_{max} = 700 \mu\text{M h}^{-1}, K_M = 330 \mu\text{M}$                                   |

|                   |                                                                                                                    |
|-------------------|--------------------------------------------------------------------------------------------------------------------|
| <b>Function</b>   | <b>Rate of synthesis of 5-HTP by tryptophan hydroxylase (<math>\mu\text{M h}^{-1}</math>)</b>                      |
|                   | $V_{TPH}(trp, bh4) = \frac{278 \cdot trp \cdot \frac{bh4}{20 + bh4}}{40 + trp + \frac{trp^2}{1000}}$               |
| <b>Parameters</b> | $V_{max} = 278 \mu\text{M h}^{-1}, K_M^{trp} = 40 \mu\text{M}, K_M^{bh4} = 20 \mu\text{M}, K_i = 1000 \mu\text{M}$ |

|                 |                                                                                                           |
|-----------------|-----------------------------------------------------------------------------------------------------------|
| <b>Function</b> | <b>Rate of production of bh4 from bh2 by dihydropteridine reductase (<math>\mu\text{M h}^{-1}</math>)</b> |
|                 |                                                                                                           |

|                   |                                                                                                                                                                                                              |
|-------------------|--------------------------------------------------------------------------------------------------------------------------------------------------------------------------------------------------------------|
|                   | $V_{DRR}(bh2, NADPH, bh4, NADP) = \frac{5000 \cdot bh2 \cdot NADPH}{(100 + bh2) \cdot (75 + NADPH)} - \frac{3 \cdot bh4 \cdot NADP}{(10 + bh4) \cdot (75 + NADP)}$                                           |
| <b>Parameters</b> | $V_{max}^{forward} = 5000 \mu\text{M h}^{-1}, V_{max}^{backward} = 3 \mu\text{M h}^{-1}, K_M^{bh4} = 10 \mu\text{M}, K_M^{bh2} = 100 \mu\text{M}, K_M^{NADPH} = 75 \mu\text{M}, K_M^{NADP} = 75 \mu\text{M}$ |

|                   |                                                                                                                                     |
|-------------------|-------------------------------------------------------------------------------------------------------------------------------------|
|                   | <p><b>Rate of trafficking between pool of tryptophan and active tryptophan in the cytosol (<math>\mu\text{M h}^{-1}</math>)</b></p> |
| <b>Function</b>   | $V_{pool}(trp, trp_{pool}) = 9 \cdot trp - 0.6 \cdot trp_{pool}$                                                                    |
| <b>Parameters</b> | N/A                                                                                                                                 |

|                   |                                                                                                                            |
|-------------------|----------------------------------------------------------------------------------------------------------------------------|
|                   | <p><b>Rate of production of c5HT from 5-HTP by aromatic amino acid decarboxylase (<math>\mu\text{M h}^{-1}</math>)</b></p> |
| <b>Function</b>   | $V_{AADC}(5HT_p) = \frac{400 \cdot 5HTP}{160 + 5HTP}$                                                                      |
| <b>Parameters</b> | $V_{max} = 400 \mu\text{M h}^{-1}, K_M = 160 \mu\text{M}$                                                                  |

|                 |                                                                                                                                                                         |
|-----------------|-------------------------------------------------------------------------------------------------------------------------------------------------------------------------|
|                 | <p><b>Rate of transport of c5HT to v5HT (RRP or reserve) by vesicular monoamine transporter (<math>\mu\text{M h}^{-1}</math>)</b></p>                                   |
| <b>Function</b> | $V_{MAT}(c5HT, v5HT) = \frac{1230 \cdot c5HT}{0.2 + c5HT} - 1 \cdot v5HT$ $V_{MAT}(c5HT, v5HT_{reserve}) = \frac{1230 \cdot c5HT}{0.2 + c5HT} - 1 \cdot v5HT_{reserve}$ |

**Parameters**

$$V_{max} = 1230 \mu\text{M h}^{-1}, K_M = 0.2 \mu\text{M}$$

**Function**

**Rate of reuptake of e5HT to c5HT by serotonin transporters ( $\mu\text{M h}^{-1}$ )**

$$V_{SERT}(e5HT, SERT_s, K_m^{app}) = \frac{250 \cdot e5HT}{K_m^{app} + e5HT} \cdot SERT_s$$

$$K_M^{app}([ESCIT], K_i) = K_m \left( 1 + \frac{[ESCIT]}{K_i} \right)$$

$$K_i([ESCIT]) = K_{i0} \cdot e^{-4 \cdot [ESCIT]} + K_{i,min}$$

**Parameters**

$$V_{max} = 250 \mu\text{M h}^{-1}, K_m = 0.06 \mu\text{M}$$

$K_M^{app}$ : apparent  $K_m$  in the presence of escitalopram ( $\mu\text{M}$ )

$[ESCIT]$ : concentration of escitalopram in brain ( $\mu\text{M}$ ), calculated as  $1000 \cdot Q_2 / (V_{brain} \cdot M_r)$ , where  $Q_2$  is quantity of escitalopram in the brain (in  $\mu\text{g}$ ),  $V_{brain}$  is volume of the mouse brain (in mL, set to 0.41 mL) and  $M_r$  is molecular weight of escitalopram ( $M_r = 324.39 \text{ g mol}^{-1}$ )

$K_i$ : inhibition constant of escitalopram ( $\mu\text{M}$ ), dependent on concentration due to allosteric binding

$K_{i,min}$ : minimum  $K_i$ , set to 0.001  $\mu\text{M}$ .

$K_{i0}$ : limits value of  $K_i$  and set to 0.05  $\mu\text{M}$ , so that  $[ESCIT] \rightarrow 0$  then  $K_i = K_{i0} + K_{i,min}$

**Rate of c5HT catabolism into 5-HIAA in cytosol and glia by monoamine oxidase and aldehyde dehydrogenase ( $\mu\text{M h}^{-1}$ )**

**Function**

$$TC_{catab}(c5HT) = \frac{4000 \cdot c5HT}{95 + c5HT}$$

$$TC_{catab}(g5HT) = \frac{4000 \cdot g5HT}{95 + g5HT}$$

**Parameters**

$$V_{max} = 4000 \mu\text{M h}^{-1}, K_M = 95 \mu\text{M}$$

**Rate of trafficking from vesicular reserve and readily releasable pool of vesicles ( $\mu\text{M h}^{-1}$ )**

**Function**

$$V_{traff}^{5HT}(v5HT, v5HT_0) = 15 \cdot (v5HT_0 - v5HT)$$

**Parameters**

N/A

**Factor of uptake 2 velocity (VU2) dependent on extracellular serotonin**

**Function**

$$H1_{5HT}(e5HT, e5HT_0) = \begin{cases} 0, & e5HT < e5HT_0 \\ 50 \cdot (e5HT - e5HT_0), & e5HT_0 < e5HT < e5HT_0 + 0.02 \\ 1, & e5HT > e5HT_0 + 0.02 \end{cases}$$

**Parameters**

N/A

**Velocity of uptake 2 reuptake of e5HT into glial terminals ( $\mu\text{M h}^{-1}$ )**

**Function**

|                   |                                                             |
|-------------------|-------------------------------------------------------------|
|                   | $V_{UP2}(e5HT) = \frac{1700 \cdot e5HT}{0.17 + e5HT}$       |
| <b>Parameters</b> | $V_{max} = 1700 \mu\text{M h}^{-1}, K_M = 0.17 \mu\text{M}$ |

|                 |                                                                                                                                                                                                                 |
|-----------------|-----------------------------------------------------------------------------------------------------------------------------------------------------------------------------------------------------------------|
|                 | <b>Rate of serotonin firing (events h<sup>-1</sup>)</b>                                                                                                                                                         |
| <b>Function</b> | $\text{fire5HT}(t) = \begin{cases} b, & t < t_{start} \\ b + r \cdot e^{-c(t-t_{start})}, & t_{start} < t < t_{finish} \\ b + r \cdot e^{-c(t-t_{start})} - e^{-c(t-t_{finish})}, & t > t_{finish} \end{cases}$ |

|                   |                                                                                                                                                                                                                                                                                                                                                                                                                                                                                                                                                                                                                                                                            |
|-------------------|----------------------------------------------------------------------------------------------------------------------------------------------------------------------------------------------------------------------------------------------------------------------------------------------------------------------------------------------------------------------------------------------------------------------------------------------------------------------------------------------------------------------------------------------------------------------------------------------------------------------------------------------------------------------------|
| <b>Parameters</b> | <p>b: basal firing when no electrical stimulation is applied, set to 1 h<sup>-1</sup><br/> r: strength of stimulation, set to 8 h<sup>-1</sup><br/> c: dissociation constant, set to 2 h<sup>-1</sup><br/> t<sub>start</sub>: start of the stimulation (h)<br/> t<sub>finish</sub>: end of stimulation (h)<br/> When a train of stimulations is applied, t<sub>start</sub> = t<sub>start</sub><sup>0</sup> + n<sub>stim</sub> · t<sub>interval</sub>, where t<sub>start</sub><sup>0</sup> is the start time of the first stimulation (h), n<sub>stim</sub> is the stim number starting from 0 and t<sub>interval</sub> is the time between electrical stimulations (h)</p> |
|-------------------|----------------------------------------------------------------------------------------------------------------------------------------------------------------------------------------------------------------------------------------------------------------------------------------------------------------------------------------------------------------------------------------------------------------------------------------------------------------------------------------------------------------------------------------------------------------------------------------------------------------------------------------------------------------------------|

|                   |                                                                                                   |
|-------------------|---------------------------------------------------------------------------------------------------|
|                   | <b>Factor of inhibition of serotonin synthesis via serotonin activated G-coupled proteins</b>     |
| <b>Function</b>   | $\text{inhib}_{5HTto5HT}^{syn}(G_{5HT}^*, G_{5HT,0}^*) = 1 - 0.1 \cdot (G_{5HT}^* - G_{5HT,0}^*)$ |
| <b>Parameters</b> | N/A                                                                                               |

|                 |                                                                                               |
|-----------------|-----------------------------------------------------------------------------------------------|
|                 | <b>Factor of inhibition of serotonin release via serotonin activated G-coupled proteins</b>   |
| <b>Function</b> | $\text{inhib}_{5HTto5HT}^R(G_{5HT}^*, G_{5HT,0}^*) = 1 - 1.5 \cdot (G_{5HT}^* - G_{5HT,0}^*)$ |

|                   |                                                                                                      |
|-------------------|------------------------------------------------------------------------------------------------------|
| <b>Parameters</b> | N/A                                                                                                  |
| <b>Function</b>   | <b>Factor of inhibition of serotonin release via histamine activated G-coupled proteins</b>          |
|                   | $inhib_{HAto5HT}^R(G_{HA}^*, G_{HA,0}^*) = 1 - 3 \cdot (G_{HA}^* - G_{HA,0}^*)$                      |
| <b>Parameters</b> | N/A                                                                                                  |
| <b>Function</b>   | <b>Rate of trafficking of SERTs from the vesicular pool to membrane surface (h<sup>-1</sup>)</b>     |
|                   | $k_{ps}(G_{5HT}^*, G_{5HT,0}^*) = 10 + 7.5 \cdot (G_{5HT}^* - G_{5HT,0}^*)$                          |
| <b>Parameters</b> | N/A                                                                                                  |
| <b>Function</b>   | <b>Rate of trafficking of SERTs from the membrane surface to the vesicular pool (h<sup>-1</sup>)</b> |
|                   | $k_{sp}(G_{5HT}^*, G_{5HT,0}^*) = 10 - 7.5 \cdot (G_{5HT}^* - G_{5HT,0}^*)$                          |
| <b>Parameters</b> | N/A                                                                                                  |
| <b>Function</b>   | <b>Rate of inactivation of SERTs by escitalopram (h<sup>-1</sup>)</b>                                |
|                   | $k_{si}([ESCIT]) = 18.75 \cdot [ESCIT]$                                                              |
| <b>Parameters</b> | [ESCIT]: escitalopram in the brain (μM)                                                              |

## Histamine terminal and glia model (Supplementary Note 4)

ODE system

$$\frac{dcHA}{dt} = \text{inhib}_{HAtOHA}^{\text{syn}}(G_{HA}^*, G_{HA,0}^*) \cdot HTDC_a \cdot V_{HTDC}(cHT) - V_{MAT}^{HA}(cHA, vHA) - V_{HNMT}(cHA) - b_1 \cdot (cHA - eHA) + V_{HAT}(eHA) - V_{MAT}^{HA}(cHA, vHA_r) \quad (27)$$

$$\frac{dvHA}{dt} = V_{MAT}^{HA}(cHA, vHA) - \text{inhib}_{HAtOHA}^R(G_{HA}^*, G_{HA,0}^*) \cdot \text{activ}_{5HTtoHA}^R(G_{5HT}^* - G_{5HT,0}^*) \cdot b_2 \cdot \text{fireha}(t) \cdot vHA + V_{traff}^{HA}(vHA, vHA_0) \quad (28)$$

$$\frac{dvHA_r}{dt} = V_{MAT}^{HA}(cHA, vHA_r) - V_{traff}^{HA}(vHA, vHA_0) \quad (29)$$

$$\begin{aligned} \frac{deHA}{dt} = & \text{inhib}_{HAtOHA}^R(G_{HA}^*, G_{HA,0}^*) \cdot \text{activ}_{5HTtoHA}^R(G_{5HT}^* - G_{5HT,0}^*) \cdot b_2 \cdot \text{fireHA}(t) \cdot vHA - V_{HAT}(eHA) + b_3 \cdot (gHA - eHA) + b_1 \cdot (cHA - eHA) \\ & - H1_{HA}(eHA) \cdot V_{HAT}^g(eHA) - b_4 \cdot eHA - k_{inf} \cdot V_{HAT}^{MC}(eHA) + \text{degranulation}(k_{inf}) \cdot vHA^{MC} \end{aligned} \quad (30)$$

$$\frac{dgHA}{dt} = H1_{HA}(eHA) \cdot V_{HAT}^g(eHA) - b_3 \cdot (gHA - eHA) - V_{HNMT}^g(gHA) + (1 + b_{12} \cdot k_{inf}) \cdot HTDC_a \cdot V_{HTDC}^g(gHT) \quad (31)$$

$$\frac{dbHT}{dt} = HT_{in} - V_{HTL}(bHT) - V_{HTL}^g(bHT) - b_5(bHT - bHT_0) - k_{inf} \cdot V_{HTL}^{MC}(bHT) \quad (32)$$

$$\frac{dcHT}{dt} = V_{HTL}(bHT) - \text{inhib}_{HAtOHA}^{\text{syn}}(G_{HA}^*, G_{HA,0}^*) \cdot HTDC_a \cdot V_{HTDC}(cHT) - b_6 \cdot cHT + b_7 \cdot cHT_{pool} \quad (33)$$

$$\frac{dcHT_{pool}}{dt} = b_6 \cdot cHT - b_7 \cdot cHT_{pool} - b_8 \cdot cHT_{pool} \quad (34)$$

$$\frac{dG_{HA}^*}{dt} = b_{13} \cdot (B_{HA})^2 \cdot (G_{HA}^{\text{total}} - G_{HA}^*) - b_{14} \cdot T_{HA}^* \cdot G_{HA}^* \quad (35)$$

$$\frac{dT_{HA}^*}{dt} = b_{15} \cdot (G_{HA}^*)^2 \cdot (T_{HA}^{\text{total}} - T_{HA}^*) - b_{16} \cdot T_{HA}^* \quad (36)$$

$$\frac{dB_{HA}}{dt} = b_{17} \cdot eHA \cdot (B_{HA}^{total} - B_{HA}) - b_{18} \cdot B_{HA} \quad (37)$$

$$\frac{dG'_{5HT}}{dt} = b_{19} \cdot (B'_{5HT})^2 \cdot (G'_{5HT}^{total} - G'_{5HT}) - b_{20} \cdot T'_{5HT} \cdot G'_{5HT} \quad (38)$$

$$\frac{dT'_{5HT}}{dt} = b_{21} \cdot (G'_{5HT})^2 \cdot (T'_{5HT}^{total} - T'_{5HT}) - b_{22} \cdot T'_{5HT} \quad (39)$$

$$\frac{dB'_{5HT}}{dt} = b_{23} \cdot e5HT \cdot (B'_{5HT}^{total} - B'_{5HT}) - b_{24} \cdot B'_{5HT} \quad (40)$$

$$\frac{dgHT}{dt} = V_{HTL}^g(bHT) - (1 + b_{12} \cdot k_{inf}) \cdot HTDC_a \cdot V_{HTDC}^g(gHT) - b_9 \cdot gHT + b_{10} \cdot gHT_{pool} \quad (41)$$

$$\frac{dgHT_{pool}}{dt} = b_9 \cdot gHT - b_{10} \cdot gHT_{pool} - b_{11} \cdot gHT_{pool} \quad (42)$$

$$\frac{dHTDC_a}{dt} = -k_{FMH}([FMH]) \cdot HTDC_a + HTDC_{in}(HTDC_a) \quad (43)$$

### Constant parameters

| Parameter | Value | Description                                                            |
|-----------|-------|------------------------------------------------------------------------|
| $b_1$     | 15    | Strength of bidirectional leakage between $cHA$ and $eHA$ ( $h^{-1}$ ) |
| $b_2$     | 3.5   | Factor of release per histamine firing event                           |
| $b_3$     | 15    | Strength of bidirectional leakage between $gHA$ and $eHA$ ( $h^{-1}$ ) |
| $b_4$     | 0.05  | Rate of $eHA$ removal ( $h^{-1}$ )                                     |
| $b_5$     | 0.25  | Strength of stabilization of $bHT$ to $bHT_0$ ( $h^{-1}$ )             |
| $b_6$     | 2.5   | Strength of trafficking from $cHT$ to $cHT_{pool}$ ( $h^{-1}$ )        |
| $b_7$     | 1     | Strength of trafficking from $cHT_{pool}$ to $cHT$ ( $h^{-1}$ )        |



|                    |          |                                                                       |
|--------------------|----------|-----------------------------------------------------------------------|
| $b_8$              | 1        | Rate of $cHT_{pool}$ removal for other uses ( $h^{-1}$ )              |
| $b_9$              | 1        | Rate of trafficking from $gHT$ to $gHT_{pool}$ ( $h^{-1}$ )           |
| $b_{10}$           | 1        | Rate of trafficking from $gHT_{pool}$ to $gHT$ ( $h^{-1}$ )           |
| $b_{11}$           | 1        | Rate of $gHT$ removal for other uses ( $h^{-1}$ )                     |
| $b_{12}$           | 10       | Factor of activation of $gHA$ synthesis due to neuroinflammation      |
| $b_{13}$           | 100      | Strength of $B_{HA}$ to produce $G_{HA}^*$ ( $h^{-1}$ )               |
| $b_{14}$           | 961.094  | Strength of $T_{HA}^*$ to deactivate $G_{HA}^*$ ( $h^{-1}$ )          |
| $b_{15}$           | 20       | Strength of $G_{HA}^*$ to produce $T_{HA}^*$ ( $h^{-1}$ )             |
| $b_{16}$           | 66.2992  | Strength of $T_{HA}^*$ decay ( $h^{-1}$ )                             |
| $b_{17}$           | 5        | Strength of $eHA$ bounding to autoreceptors ( $h^{-1}$ )              |
| $b_{18}$           | 65.6179  | Strength of $eHA$ unbounding from autoreceptors ( $h^{-1}$ )          |
| $b_{19}$           | 20       | Strength of $B'_{5HT}$ to produce $G'_{5HT}$ ( $h^{-1}$ )             |
| $b_{20}$           | 200      | Strength of $T'_{5HT}$ to deactivate $G'_{5HT}$ ( $h^{-1}$ )          |
| $b_{21}$           | 30       | Strength of $G'_{5HT}$ to produce $T'_{5HT}$ ( $h^{-1}$ )             |
| $b_{22}$           | 200      | Strength of $T'_{5HT}$ decay ( $h^{-1}$ )                             |
| $b_{23}$           | 36       | Strength of $e5HT$ bounding to heteroreceptors ( $h^{-1}$ )           |
| $b_{24}$           | 20       | Strength of $e5HT$ unbounding to heteroreceptors ( $h^{-1}$ )         |
| $G_{HA}^{total}$   | 10       | Total G protein in histamine autoreceptors ( $\mu M$ )                |
| $T_{HA}^{total}$   | 10       | Total regulator of G protein from histamine autoreceptors ( $\mu M$ ) |
| $B_{HA}^{total}$   | 10       | Total histamine autoreceptors ( $\mu M$ )                             |
| $G'_{5HT}^{total}$ | 10       | Total G protein in serotonin heteroreceptors ( $\mu M$ )              |
| $T'_{5HT}^{total}$ | 10       | Total regulator of G protein in serotonin heteroreceptors ( $\mu M$ ) |
| $B'_{5HT}^{total}$ | 10       | Total serotonin heteroreceptors ( $\mu M$ )                           |
| $HT_{in}$          | 636.5570 | Rate of blood histidine replenishment ( $\mu M h^{-1}$ )              |
| $bHT_0$            | 100      | $bHT$ in equilibrium ( $\mu M$ )                                      |
| $vHA_0$            | 63.05    | $vHA$ in equilibrium ( $\mu M$ )                                      |
| $G_{HA,0}^*$       | 0.7484   | $G_{HA}^*$ in equilibrium ( $\mu M$ )                                 |
| $G'_{5HT,0}$       | 0.8561   | $G'_{5HT}$ in equilibrium ( $\mu M$ )                                 |

*System variables and initial conditions*

| <b>Variable</b> | <b>Initial condition</b> | <b>Description</b>                                                                |
|-----------------|--------------------------|-----------------------------------------------------------------------------------|
| $cHA$           | 3.1074                   | Cytosolic histamine concentration ( $\mu\text{M}$ )                               |
| $vHA$           | 136.3639                 | Vesicular histamine in readily releasable pool ( $\mu\text{M}$ )                  |
| $vHA_r$         | 241.9217                 | Reserve of vesicular histamine ( $\mu\text{M}$ )                                  |
| $eHA$           | 1.4378                   | Extracellular histamine ( $\mu\text{M}$ )                                         |
| $gHA$           | 2.0126                   | Glial cytosolic histamine ( $\mu\text{M}$ )                                       |
| $bHT$           | 99.7316                  | Blood histidine ( $\mu\text{M}$ )                                                 |
| $cHT$           | 249.3265                 | Cytosolic histidine ( $\mu\text{M}$ )                                             |
| $cHT_{pool}$    | 311.6581                 | Cytosolic histidine pool ( $\mu\text{M}$ )                                        |
| $G_{HA}^*$      | 0.7114                   | Histamine activated G-protein from autoreceptors ( $\mu\text{M}$ )                |
| $T_{HA}^*$      | 1.3245                   | Regulator of histamine activated G-protein from autoreceptors ( $\mu\text{M}$ )   |
| $B_{HA}$        | 0.9874                   | Autoreceptor bound histamine ( $\mu\text{M}$ )                                    |
| $G'_{5HT}$      | 0.8660                   | Serotonin activated G-protein from heteroreceptors ( $\mu\text{M}$ )              |
| $T'_{5HT}$      | 1.0112                   | Regulator of serotonin activated G-protein from heteroreceptors ( $\mu\text{M}$ ) |
| $B'_{5HT}$      | 0.9791                   | Heteroreceptor bound serotonin ( $\mu\text{M}$ )                                  |
| $gHT$           | 354.6656                 | Glial cytosolic histidine ( $\mu\text{M}$ )                                       |
| $gHT_{pool}$    | 177.3328                 | Glial cytosolic pool of histidine ( $\mu\text{M}$ )                               |
| $HTDC_\alpha$   | 1                        | Ratio of active histidine decarboxylase                                           |

*Function-defined variables*

|                   |                                                                                        |
|-------------------|----------------------------------------------------------------------------------------|
| <b>Function</b>   | <b>Rate of transport of bHT to cHT in HA neurons (<math>\mu\text{M h}^{-1}</math>)</b> |
|                   | $V_{HTL}(bHT) = \frac{4680 \cdot bHT}{1000 + bHT}$                                     |
| <b>Parameters</b> | $V_{max} = 4680 \mu\text{M h}^{-1}, K_M = 1000 \mu\text{M}$                            |

|                   |                                                                                  |
|-------------------|----------------------------------------------------------------------------------|
| <b>Function</b>   | <b>Rate of transport of bHT to gHT in glia (<math>\mu\text{M h}^{-1}</math>)</b> |
|                   | $V_{HTL}^g(bHT) = \frac{2340 \cdot bHT}{1000 + bHT}$                             |
| <b>Parameters</b> | $V_{max} = 4680 \mu\text{M h}^{-1}, K_M = 1000 \mu\text{M}$                      |

|                 |                                                                                                         |
|-----------------|---------------------------------------------------------------------------------------------------------|
| <b>Function</b> | <b>Rate of cHA synthesis by histidine decarboxylase in HA neurons (<math>\mu\text{M h}^{-1}</math>)</b> |
|                 | $V_{HTDC}(cHT) = \frac{234 \cdot cHT}{270 + cHT}$                                                       |

Parameters

$$V_{max} = 230 \mu\text{M h}^{-1}, K_M = 270 \mu\text{M}$$

Function

Rate of gHA synthesis by histidine decarboxylase in glia ( $\mu\text{M h}^{-1}$ )

$$V_{HTDC}^g(cHT) = \frac{61.4250 \cdot cHT}{270 + cHT}$$

Parameters

$$V_{max} = 61.4250 \mu\text{M h}^{-1}, K_M = 270 \mu\text{M}$$

Function

Rate of transport of cHA to vHA (RRP or reserve) by monoamine transporter in HA neuron ( $\mu\text{M h}^{-1}$ )

$$V_{MAT}^{HA}(cHA, vHA) = \frac{10552 \cdot cHA}{24 + cHA} - 5 \cdot vHA$$

$$V_{MAT}^{HA}(cHA, vHA_{reserve}) = \frac{10552 \cdot cHA}{24 + cHA} - 5 \cdot vHA_{reserve}$$

Parameters

$$V_{max} = 10552 \mu\text{M h}^{-1}, K_M = 24 \mu\text{M}$$

Function

Rate of cHA metabolism by histamine methyltransferase in HA neuron ( $\mu\text{M h}^{-1}$ )

|                   |                                                             |
|-------------------|-------------------------------------------------------------|
|                   | $V_{HNMT}(cHA) = \frac{185.5 \cdot cHA}{4.2 + cHA}$         |
| <b>Parameters</b> | $V_{max} = 185.5 \mu\text{M h}^{-1}, K_M = 4.2 \mu\text{M}$ |

|                   |                                                                                                        |
|-------------------|--------------------------------------------------------------------------------------------------------|
|                   | <b>Rate of gHA metabolism by histamine methyltransferase in glia (<math>\mu\text{M h}^{-1}</math>)</b> |
| <b>Function</b>   | $V_{HNMT}^g(cHA) = \frac{212 \cdot cHA}{4.2 + cHA}$                                                    |
| <b>Parameters</b> | $V_{max} = 185.5 \mu\text{M h}^{-1}, K_M = 4.2 \mu\text{M}$                                            |

|                   |                                                                                                             |
|-------------------|-------------------------------------------------------------------------------------------------------------|
|                   | <b>Rate of eHA reuptake by the putative HA transporter into HA neuron (<math>\mu\text{M h}^{-1}</math>)</b> |
| <b>Function</b>   | $V_{HAT}(eHA) = \frac{4128.3 \cdot eHA}{10 + eHA}$                                                          |
| <b>Parameters</b> | $V_{max} = 4128.3 \mu\text{M h}^{-1}, K_M = 10 \mu\text{M}$                                                 |

|                   |                                                                                                        |
|-------------------|--------------------------------------------------------------------------------------------------------|
|                   | <b>Rate of eHA reuptake by the putative HA transporter into glia (<math>\mu\text{M h}^{-1}</math>)</b> |
| <b>Function</b>   | $V_{HAT}^g(eHA) = \frac{13500 \cdot eHA}{10 + eHA}$                                                    |
| <b>Parameters</b> |                                                                                                        |

$$V_{max} = 13500 \mu\text{M h}^{-1}, K_M = 10 \mu\text{M}$$

**Rate of trafficking from histamine vesicular reserve and readily releasable pool of vesicles ( $\mu\text{M h}^{-1}$ )**

**Function**

$$V_{traff}^{HA}(vHA, vHA_0) = 15 \cdot (vHA - vHA_0)$$

**Parameters**

N/A

**Factor of glia histamine reuptake dependent on eHA**

**Function**

$$H1_{HA}(eHA) = \begin{cases} 0.025, & eHA < 0.025 \\ 0.1 \cdot (e5HT - 19), & 0.025 < eHA < 29 \\ 1, & e5HT > 29 \end{cases}$$

**Parameters**

N/A

**Rate of histamine firing (events  $\text{h}^{-1}$ )**

**Function**

$$fireHA(t) = \begin{cases} b, & t < t_{start} \\ b + r \cdot e^{-c(t-t_{start})}, & t_{start} < t < t_{finish} \\ b + r \cdot e^{-c(t-t_{start})} - e^{-c(t-t_{finish})}, & t > t_{finish} \end{cases}$$

**Parameters**

$b$ : basal firing when no electrical stimulation is applied, set to 1 event  $\text{h}^{-1}$   
 $r$ : strength of stimulation, set to 150 event  $\text{h}^{-1}$   
 $c$ : dissociation constant, set to 2  $\text{h}^{-1}$   
 $t_{start}$ : start of the stimulation (h)

$t_{finish}$ : end of stimulation (h)  
 When a train of stimulations is applied,  $t_{start} = t_{start}^0 + n_{stim} \cdot t_{interval}$ , where  $t_{start}^0$  is the start time of the first stimulation (h),  $n_{stim}$  is the stim number starting from 0 and  $t_{interval}$  is the time between electrical stimulations (h)

|                   |                                                                                               |
|-------------------|-----------------------------------------------------------------------------------------------|
|                   | <b>Factor of inhibition of histamine synthesis via histamine activated G-coupled proteins</b> |
| <b>Function</b>   | $inhib_{HAtoHA}^{syn}(G_{HA}^*, G_{HA,0}^*) = 1 - 0.1 \cdot (G_{HA}^* - G_{HA,0}^*)$          |
| <b>Parameters</b> | N/A                                                                                           |

|                   |                                                                                             |
|-------------------|---------------------------------------------------------------------------------------------|
|                   | <b>Factor of inhibition of histamine release via histamine activated G-coupled proteins</b> |
| <b>Function</b>   | $inhib_{HAtoHA}^R(G_{HA}^*, G_{HA,0}^*) = 1 - 2 \cdot (G_{HA}^* - G_{HA,0}^*)$              |
| <b>Parameters</b> | N/A                                                                                         |

|                   |                                                                                                                |
|-------------------|----------------------------------------------------------------------------------------------------------------|
|                   | <b>Factor of activation of histamine release via serotonin activated G-coupled proteins in heteroreceptors</b> |
| <b>Function</b>   | $activ_{5HTtoHA}^R(G_{5HT}^* - G_{5HT,0}^*) = 1 + 3 \cdot (G_{5HT}^* - G_{5HT,0}^*)$                           |
| <b>Parameters</b> | N/A                                                                                                            |

|                 |                                                                                         |
|-----------------|-----------------------------------------------------------------------------------------|
|                 | <b>Inactivation speed of histidine decarboxylase by FMH inhibition (h<sup>-1</sup>)</b> |
| <b>Function</b> | $k_{FMH} = k_1 \cdot \frac{k_2}{k_2 + k_3} \cdot \frac{[FMH]}{K_i + [FMH]}$             |

**Parameters**

$k_1 \cdot \frac{k_2}{k_2+k_3}$ : inactivation rate (set to 10.40 h<sup>-1</sup>).  $k_1$  is the rate of FMH binding to the enzyme (h<sup>-1</sup>),  $k_2$  is the rate of FMH covalently binding to histidine decarboxylase (h<sup>-1</sup>) and  $k_3$  is the rate of FMH becoming non-reactive and not binding covalently to the enzyme (h<sup>-1</sup>)  
[FMH]: concentration of FMH in μM  
 $K_i$ : dissociation constant of the FMH-HTDC complex (set to 8.3 μM)

**Function**

**Replenishment of histidine decarboxylase by protein synthesis (h<sup>-1</sup>)**

$$HTDC_{in}(HTDC_a) = 0.55 \cdot (1 - HTDC_a)$$

**Parameters**

$HTDC_a$ : ratio of active histidine decarboxylase.

## Mast cell model (Supplementary Note 5)

*ODE system*

$$\frac{dcHT^{MC}}{dt} = k_{inf} \cdot V_{HTL}^{MC}(bHT) - HTDC_a \cdot V_{HTDC}^{MC}(cHT^{MC}) - c_1 \cdot cHT^{MC} + c_2 \cdot cHT_{pool}^{MC} \quad (44)$$

$$\frac{dcHT_{pool}^{MC}}{dt} = c_1 \cdot cHT^{MC} - c_2 \cdot cHT_{pool}^{MC} - c_3 \cdot cHT_{pool}^{MC} \quad (45)$$



$$\frac{dcHA^{MC}}{dt} = HTDC_a \cdot V_{HTDC}^{MC}(cHT^{MC}) - V_{MAT,HA}^{MC}(cHA^{MC}, vHA^{MC}) - V_{HNMT}^{MC}(cHA^{MC}) + k_{inf} \cdot V_{HAT}^{MC}(eHA) \quad (46)$$

$$\frac{dvHA^{MC}}{dt} = V_{MAT,HA}^{MC}(cHA^{MC}, vHA^{MC}) - degranulation(k_{inf}) \cdot vHA^{MC} \quad (47)$$

*Constant parameters*

| Parameter | Value | Description                                                               |
|-----------|-------|---------------------------------------------------------------------------|
| $c_1$     | 1     | Strength of trafficking from $cHT^{MC}$ to $cHT_{pool}^{MC}$ ( $h^{-1}$ ) |
| $c_2$     | 1     | Strength of trafficking from $cHT_{pool}^{MC}$ $cHT^{MC}$ to ( $h^{-1}$ ) |
| $c_3$     | 1     | Rate of $cHT^{MC}$ removal for other uses ( $h^{-1}$ )                    |

*System variables and initial conditions*

| Variable          | Initial condition | Description                                        |
|-------------------|-------------------|----------------------------------------------------|
| $cHT^{MC}$        | 350               | Cytosolic histidine in mast cells ( $\mu M$ )      |
| $cHT_{pool}^{MC}$ | 150               | Cytosolic histidine pool in mast cells ( $\mu M$ ) |
| $cHA^{MC}$        | 3                 | Cytosolic histamine in mast cells ( $\mu M$ )      |
| $vHA^{MC}$        | 140               | Vesicular histamine in mast cells ( $\mu M$ )      |

*Function-defined variables*

| Function | Rate of transport of bHT to cHT in mast cells ( $\mu M h^{-1}$ ) |
|----------|------------------------------------------------------------------|
|          |                                                                  |

$$V_{HTL}^{MC}(bHT) = \frac{109.5 \cdot bHT}{1000 + bHT}$$

Parameters

$$V_{max} = 219 \mu\text{M h}^{-1}, K_M = 1000 \mu\text{M}$$

**Rate of gHA synthesis by histidine decarboxylase in glia ( $\mu\text{M h}^{-1}$ )**

Function

$$V_{HTDC}^{MC}(cHT^{MC}) = \frac{877.50 \cdot cHT^{MC}}{270 + cHT^{MC}}$$

Parameters

$$V_{max} = 877.50 \mu\text{M h}^{-1}, K_M = 270 \mu\text{M}$$

**Rate of transport of cHA to vHA by monoamine transporter in mast cell ( $\mu\text{M h}^{-1}$ )**

Function

$$V_{MAT,HA}^{MC}(cHA^{MC}, vHA^{MC}) = \frac{21104 \cdot cHA^{MC}}{24 + cHA^{MC}} - 5 \cdot vHA^{MC}$$

Parameters

$$V_{max} = 21104 \mu\text{M h}^{-1}, K_M = 24 \mu\text{M}$$

**Rate of cHA metabolism by histamine methyltransferase in mast cells ( $\mu\text{M h}^{-1}$ )**

Function

$$V_{HNMT}^{MC}(cHA^{MC}) = \frac{21.20 \cdot cHA^{MC}}{4.2 + cHA^{MC}}$$

**Parameters**

$$V_{max} = 21.20 \mu\text{M h}^{-1}, K_M = 4.2 \mu\text{M}$$

**Function**

**Rate of eHA reuptake by the putative HA transporter into glia ( $\mu\text{M h}^{-1}$ )**

$$V_{HAT}^{MC}(eHA) = \frac{3375 \cdot eHA}{10 + eHA}$$

**Parameters**

$$V_{max} = 3375 \mu\text{M h}^{-1}, K_M = 10 \mu\text{M}$$

**Function**

**Factor of activation of neuroinflammation: synthesis and release of histamine by glia and mast cells ( $\mu\text{M h}^{-1}$ )**

$$k_{inf}(t, switch_{inf}, t_{start}) = \begin{cases} 0.001 \cdot switch_{inf} & t < t_{start} \\ \frac{switch_{MC}}{1 + e^{-20(t-t_h)}} & t > t_{start} \end{cases}$$

$$t_h = t_{start} + \frac{\ln(999)}{20}$$

**Parameters**

$t_{start}$ : start time of neuroinflammation processes (h)

$t_h$ : time at which the sigmoid function is at 50% its capacity, so that  $k_{inf} = 0$  (h)

$switch_{inf}$ : boolean (takes the value of 0 or 1) which activates or deactivates the process of histamine turnover from mast cells and glia

**Factor of degranulation strength dependent on activation of degranulation ( $\mu\text{M h}^{-1}$ )**

**Function**

$$\text{degranulation}(k_{inf}) = 3 \cdot k_{inf}$$

**Parameters**

$k_{inf}$ : factor of activation of synthesis and release of histamine (see function above)

## Supplementary figures

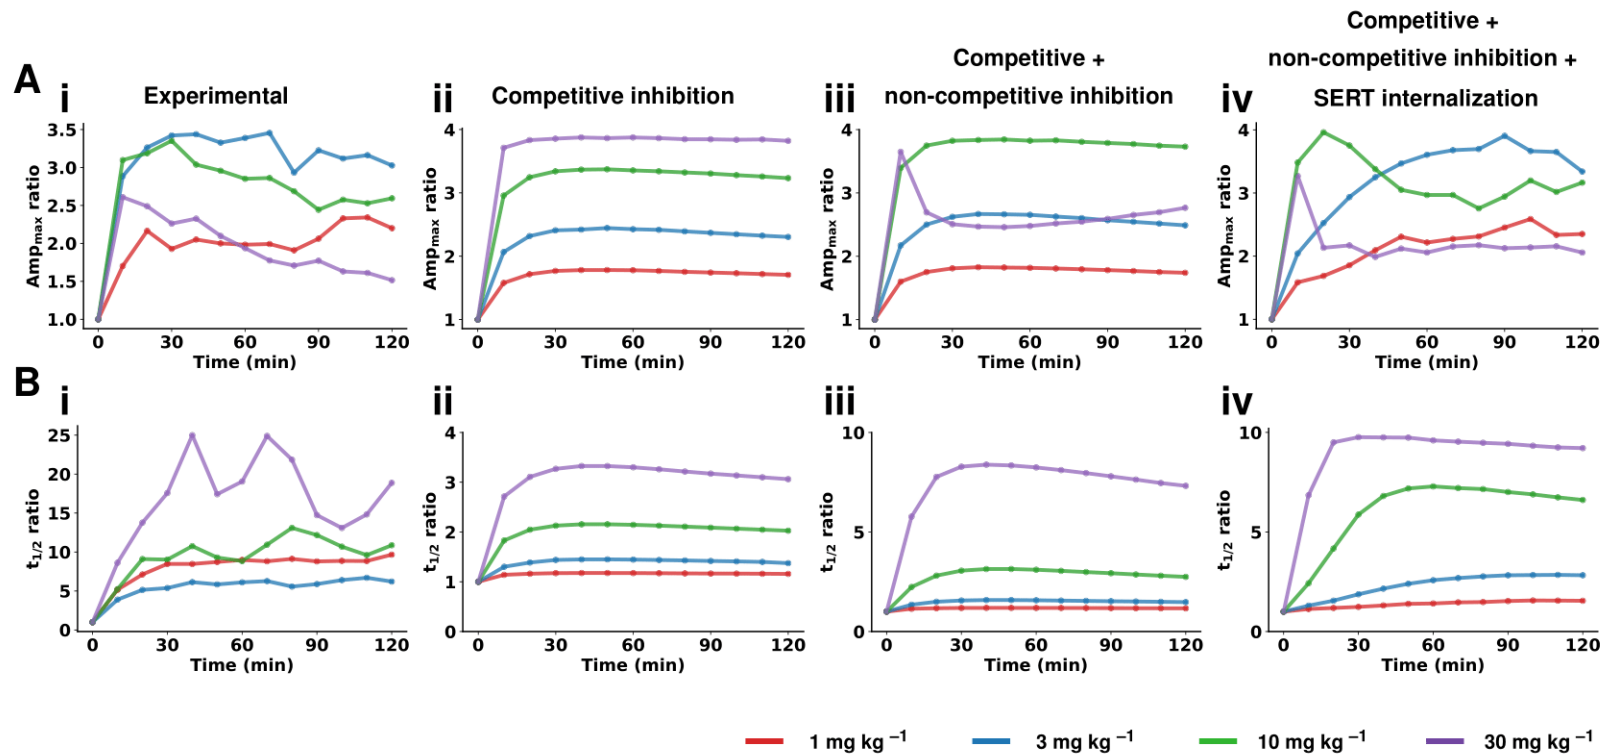

Figure S1. Maximum Amplitude and Clearance of Experimental and Simulated FSCV Traces. (A) Ratio of maximum amplitude respect to control (pre-drug administration) over time for the (i) experimental traces, (ii) traces simulated including escitalopram competitive inhibition, (iii) Simulated traces adding escitalopram non-competitive inhibition and (iv) simulated traces adding SERT internalization. (B) Ratio of half-life of evoked serotonin respect to control (pre-drug administration) over time for the same conditions given in panel A. Doses given and simulated are provided in the legend.

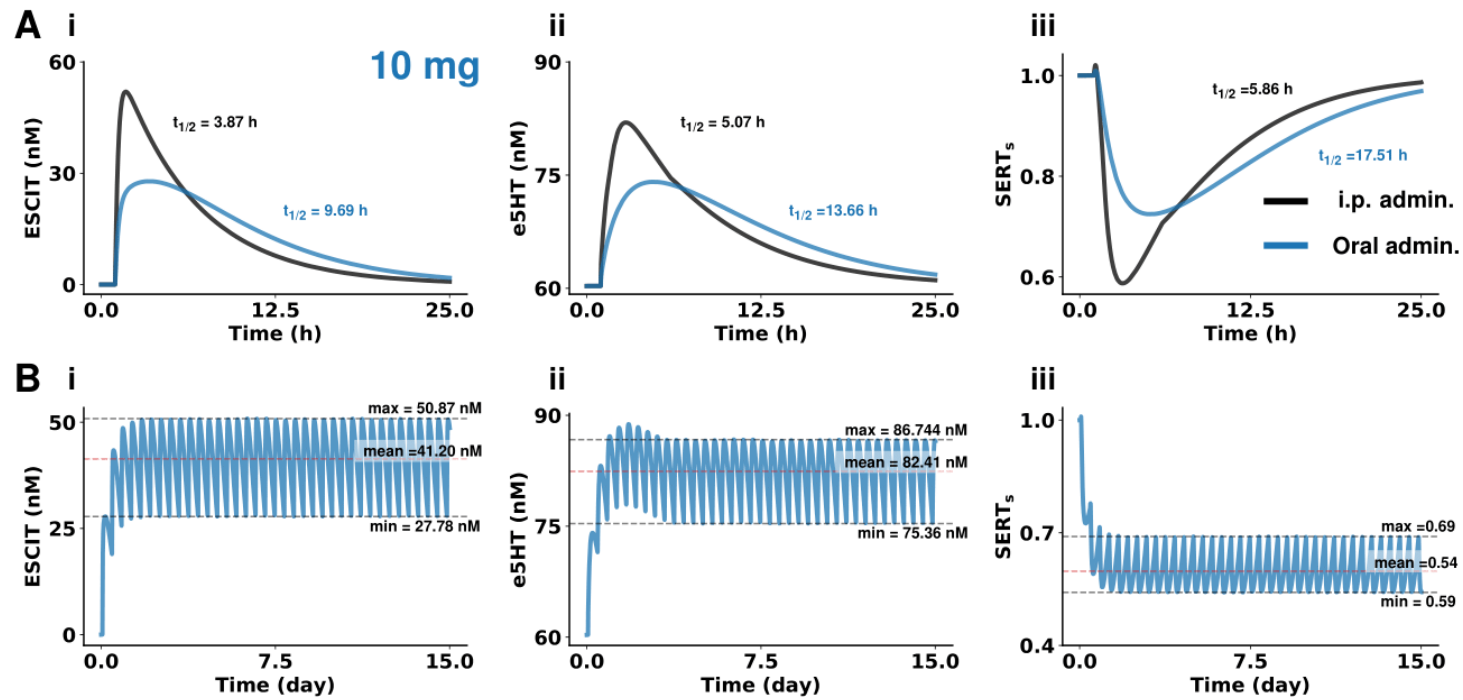

Figure S2: Chronic Oral Administration of 10 mg Escitalopram. (A) Modelling simulations illustrating brain concentrations of escitalopram (i), serotonin (ii), and SERT surface ratio (iii) following intraperitoneal (i.p.) injection or oral administration of  $2.06 \text{ mg kg}^{-1}$  (equivalent to a 10 mg human dose). The provided data includes clearance half-lives. (B) Simulation depicting the impact of chronic oral dosing on escitalopram (i), serotonin (ii), and SERT surface ratio (iii). Administration is repeated every 8 hours, mirroring the human daily dose regimen. Panels present the oscillation's maximum and minimum values, as well as the mean cumulative concentration.

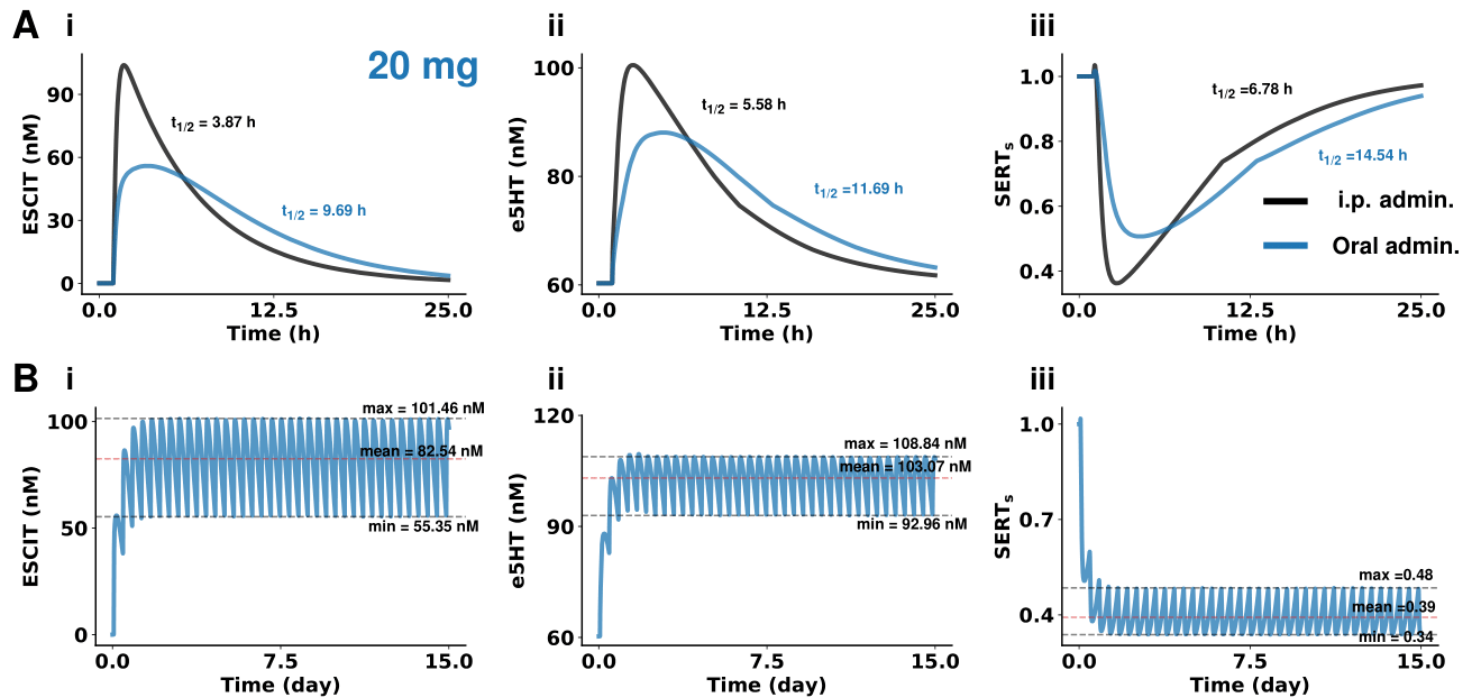

Figure S3: Chronic Oral Administration of 20 mg Escitalopram. (A) Modelling simulations illustrating brain concentrations of escitalopram (i), serotonin (ii), and SERT surface ratio (iii) following intraperitoneal (i.p.) injection or oral administration of  $4.11 \text{ mg kg}^{-1}$  (equivalent to a 20 mg human dose). The provided data includes clearance half-lives. (B) Simulation depicting the impact of chronic oral dosing on escitalopram (i), serotonin (ii), and SERT surface ratio (iii). Administration is repeated every 8 hours, mirroring the human daily dose regimen. Panels present the oscillation's maximum and minimum values, as well as the mean cumulative concentration.

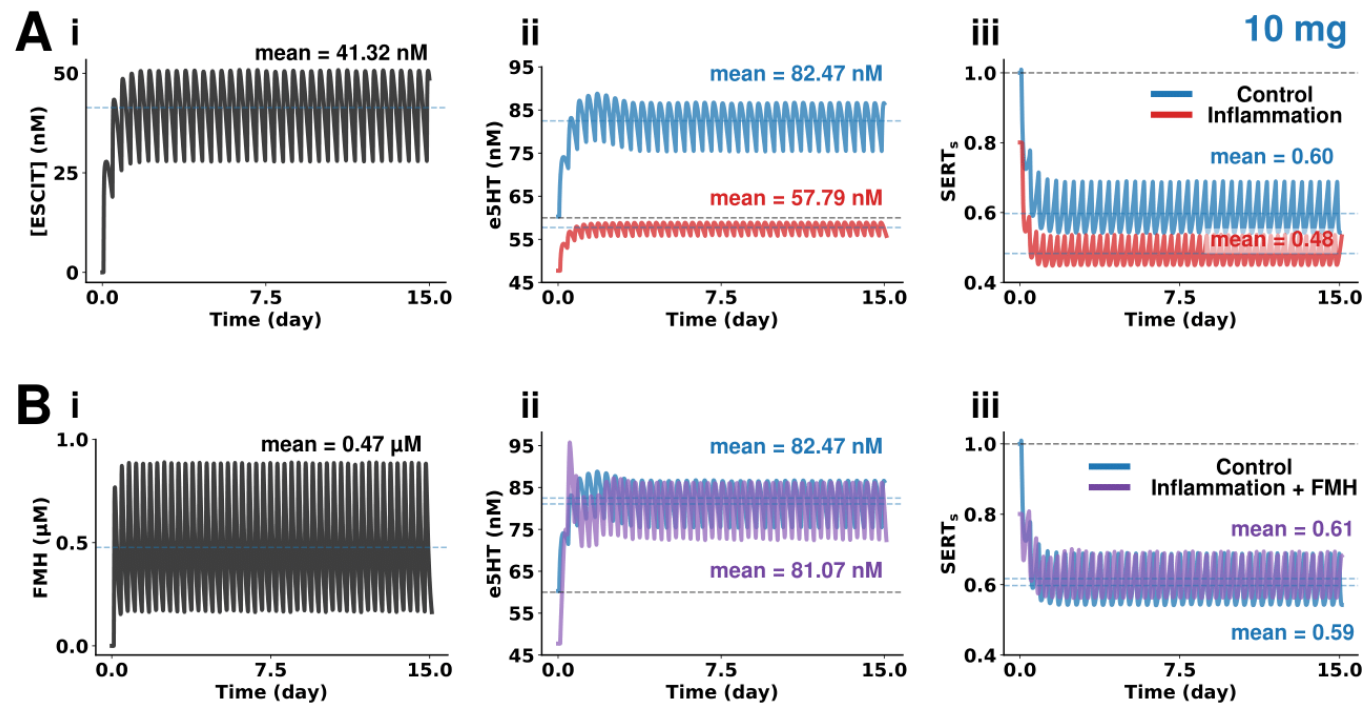

Figure S4: Impact of Oral Chronic Administration of 10 mg Escitalopram During Inflammation. (A) Modelling results depicting the brain concentrations of escitalopram (i), serotonin (ii), and the SERT surface ratio (iii) during oral chronic dosing of escitalopram (equivalent to a 10 mg pill or  $\sim 2.06 \text{ mg kg}^{-1}$ ) in both the control state and in the presence of inflammation. The inflammation simulation involves the release of histamine triggered by mast cells and glia 35 days prior to the first dose, followed by administration every 8 hours. (B) Modelling outcomes of oral chronic co-administration of FMH (equivalent to a 2.5 mg human dose for mice or  $\sim 0.51 \text{ mg kg}^{-1}$ ) and escitalopram (at the same dose as in A) during inflammation (shown in purple), compared to control escitalopram administration as outlined in panel A (shown in blue).



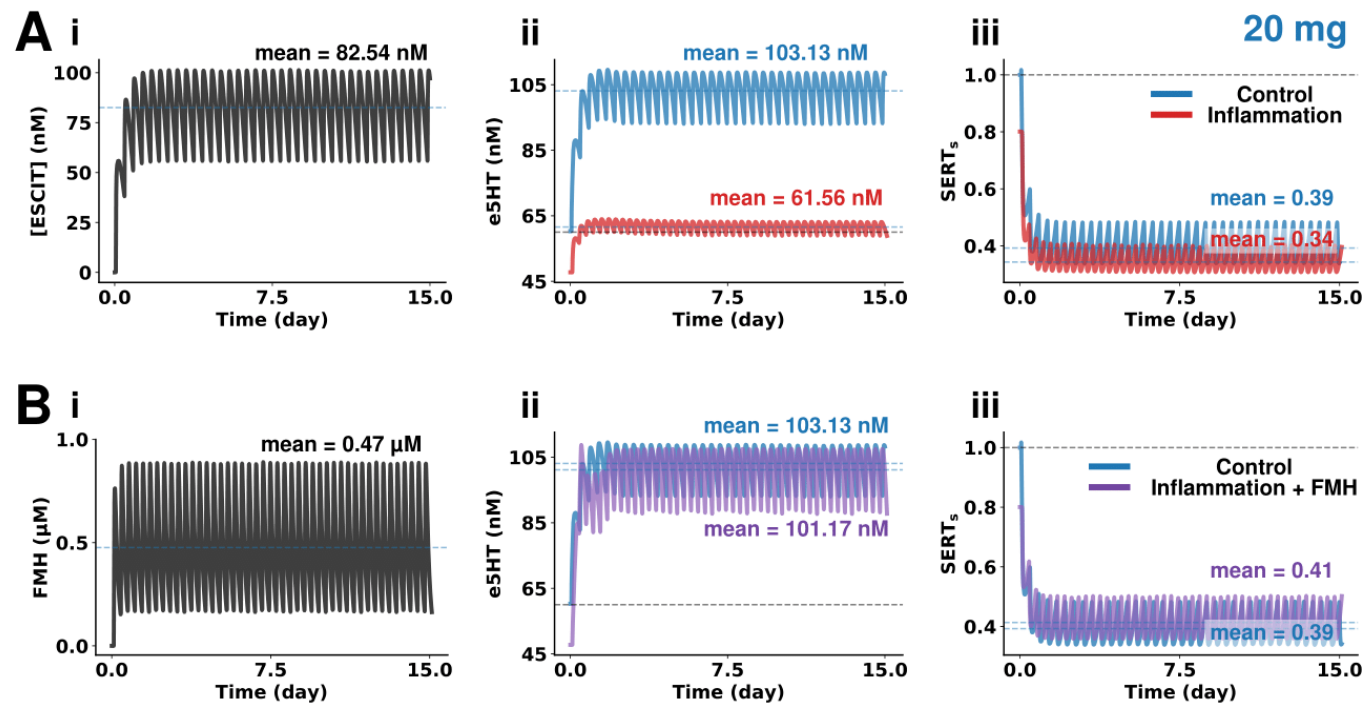

Figure S5: Impact of Oral Chronic Administration of 20 mg Escitalopram During Inflammation. (A) Modelling results depicting the brain concentrations of escitalopram (i), serotonin (ii), and the SERT surface ratio (iii) during oral chronic dosing of escitalopram (equivalent to a 20 mg pill or  $\sim 4.11 \text{ mg kg}^{-1}$ ) in both the control state and in the presence of inflammation. The inflammation simulation involves the release of histamine triggered by mast cells and glia 35 days prior to the first dose, followed by administration every 8 hours. (B) Modelling outcomes of oral chronic co-administration of FMH (equivalent to a 2.5 mg human dose for mice or  $\sim 0.51 \text{ mg kg}^{-1}$ ) and escitalopram (at the same dose as in A) during inflammation (shown in purple), compared to control escitalopram administration as outlined in panel A (shown in blue).
